# Supplementary material for: Design of visible-light photocatalysts by coupling of narrow bandgap semiconductors and TiO2: effect of their relative energy band positions on the photocatalytic efficiency
Source: Royal Society of Chemistry journal article supplement (doi:10.1039/c3cy00004d), 2013-01-01
Supplement: c3cy00004d.pdf [file c3cy00004d.pdf]

## Electronic Supplementary Information

### **Design of Visible-Light Photocatalysts by Coupling of Narrow Bandgap Semiconductors and TiO<sub>2</sub>: Effect of Their Relative Energy Band Positions in Photocatalytic Efficiency**

Sher Bahadur Rawal,<sup>a</sup> Sandipan Bera,<sup>a</sup> Daeki Lee,<sup>b</sup> Du-Jeon Jang<sup>b</sup> and Wan In Lee\*<sup>a</sup>

<sup>a</sup>*Department of Chemistry, Inha University, Incheon 402-751, Republic of Korea*

*E-mail: [wanin@inha.ac.kr](mailto:wanin@inha.ac.kr); Fax: +82-32-867-5604; Tel: +82-32-863-1026*

<sup>b</sup>*School of Chemistry, Seoul National University, Seoul 151-747, Republic of Korea*

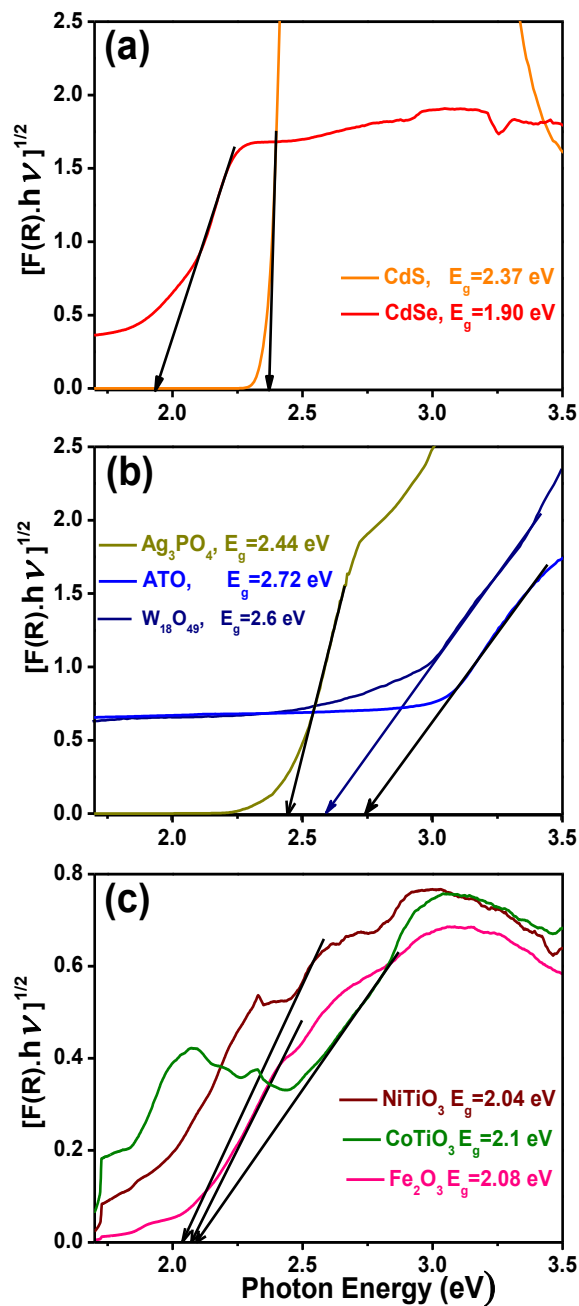

**Fig. S1.** Diffuse reflectance spectra of sensitizers belonging to Sen-A (a), Sen-B (b), and Sen-C (c), and determination of their bandgaps by plotting Kubelka-Munk function  $[F(R).h\nu]^{1/2}$  versus photon energy (eV).

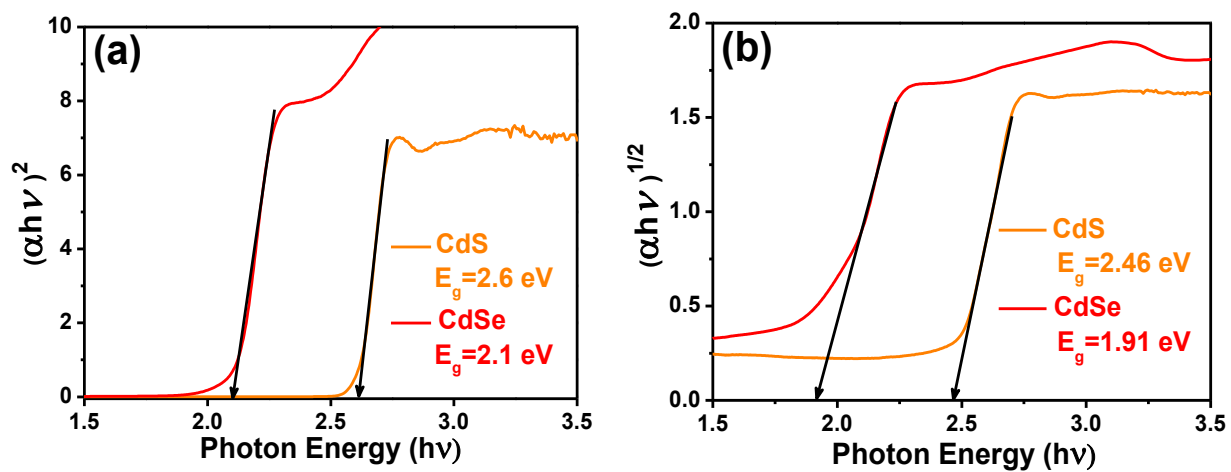

**Fig. S2.** Estimated band gaps of CdS and CdSe QDs belonging to Sen-A by Tauc plot, exhibiting direct band gaps (a) and indirect band gaps (b).

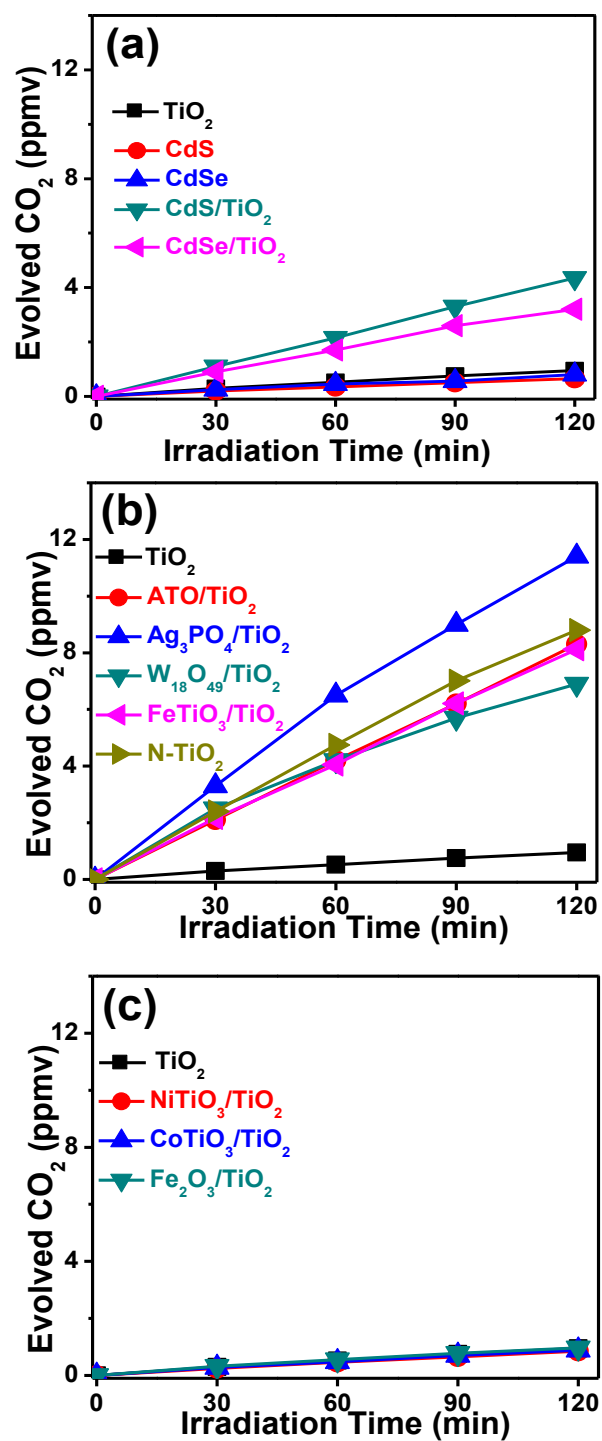

**Fig. S3.** Visible-light photocatalytic activities of several Type-A (a), Type-B (b), and Type-C (c) heterojunction structures. Gaseous 2-propanol was used as a model compound, and the amounts of CO<sub>2</sub> evolved were monitored as function of irradiation time.

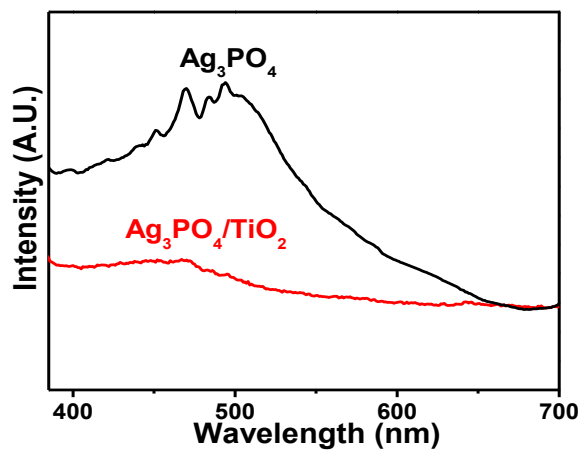

**Fig. S4.** PL spectra of bare  $\text{Ag}_3\text{PO}_4$  and  $\text{Ag}_3\text{PO}_4/\text{TiO}_2$  heterocomposite.

It was found that  $\text{Ag}_3\text{PO}_4/\text{TiO}_2$  showed much smaller PL intensity than  $\text{Ag}_3\text{PO}_4$ , as shown in the [Fig. S4](#). The obtained result clearly indicates that the charge recombination in the  $\text{Ag}_3\text{PO}_4$  was reduced by coupling with  $\text{TiO}_2$ , thus supporting the hole transfer from  $\text{Ag}_3\text{PO}_4$  VB to  $\text{TiO}_2$ .
